# Supplementary material for: Cytokines in Relation to Motor Activity in an Acute Psychiatric Population
Source: Front Psychiatry. 2019 Dec 19;10:920. doi: 10.3389/fpsyt.2019.00920 (PMC6930926; doi:10.3389/fpsyt.2019.00920)
Supplement: Supplementary file 2 [file DataSheet_2.xlsx]

## Sheet: Data file motor activity cytoki
ID	NAP_UP_andre	IL1beta	IL6	TNFalpha	IFNgamma	IL10	IL4	TGF_beta1_ngml	Motor_retardation	Dicho_retardation	Motor_activity	Dicho_activity
AG45001	3	0.03	0.05	12.62	0.02	0.05	0.46	128.396	1	0	3	1
AG45003	3	0.03	0.05	24.69	0.12	0.05	0.46	80.9133	1	0	2	1
AG45004	1	0.03	98.01	23.77	82.16	37.03	0.46	94.8791	3	1	2	1
AG45005	3	0.03	46.36	28.72	1.06	61.28	0.46	41.9232	1	0	1	0
AG45007	3	2.14	4.92	14.17	4.48	21.81	0.46	118.437			2	1
AG45008	3	0.03	18.06	24.69	1.53	45.5	0.46	78.9562	2	1	1	0
AG45009	2	0.03	0.05	17.22	3.85	63.94	0.46	76.2366	2	1	1	0
AG45011	1	0.03	0.05	29.27	0.02	0.05	0.46	73.6558	2	1	1	0
AG45012	3	0.03	0.05	25	1.99	0.05	0.46	91.2114	1	0	3	1
AG45014	3	0.03	0.05	27.05	0.02	0.05	0.46	100.388	2	1	1	0
AG45016	2	0.03	0.05	30.86	0.02	0.05	0.46	69.6264	3	1	1	0
AG45017	3	0.03	0.05	45.6	7.08	0.05	35.99	101.074	2	1	1	0
AG45021	3	0.03	0.05	18.73	25.36	102.13	0.46	81.1402	2	1	1	0
AG45022	3	0.03	78.44	25.3	14.87	138.28	25.24	61.2121
AG45024	3	0.03	92.7	34.63	62.98	0.05	0.46	88.1191	1	0	1	0
AG45026	3	43.43	0.05	16.83	7.54	52.45	0.46	42.1416	2	1	1	0
AG45028	3								2	1	1	0
AG45033	2	11.85	93.04	26.47	20.58	0.05	0.46	63.8784	2	1	1	0
AG45034	2	0.03	0.05	58.71	0.02	0.05	3.24	34.8396	1	0	2	1
AG45036	3	0.03	0.05	30.34	0.02	45.5	0.46	36.4698	3	1	1	0
AG45042	1								1	0	2	1
AG45047	3	1.87	138.07	29.54	3.38	287.65	7.65	64.8928	1	0	2	1
AG45049	2	0.03	0.05	12.51	87.79	0.05	7.65	56.837	2	1	1	0
AG45052	3	0.03	0.05	6.07	0.02	0.05	0.46	86.1789	1	0	3	1
AG45054	3	0.03	0.05	35.83	3.38	154.96	0.46	90.5777	1	0	2	1
AG45055	1								3	1	1	0
AG45056	1	0.03	0.05	13.29	0.1	0.05	0.46	94.7208	1	0	1	0
AG45058	3	0.03	13.29	51.47	1.6	0.05	0.46	46.1665	1	0	2	1
AG45059	3	0.03	0.05	42.51	1.53	0.05	0.46	68.5731	1	0	2	1
AG45061	1	0.03	83.81	0.35	33.55	0.05	0.46	64.674	1	0	3	1
AG45062	3	13.06	14.82	11	281.27	0.05	0.46	81.0645	2	1	1	0
AG45064	3	0.03	0.05	30.6	19.44	68.93	0.46	86.0137	1	0	2	1
AG45066	3	0.03	0.05	28.72	0.12	0.05	0.46	99.7663	2	1	1	0
AG45067	3	0.03	0.05	12.03	4.48	0.05	0.46	66.6013	1	0	1	0
AG45068	3	0.03	68.37	19.81	5.69	119.15	40.38	60.6985	1	0	2	1
AG45070	3	0.03	0.05	29.27	11.21	0.05	54.39	64.9116	2	1	1	0
AG45072	3	0.98	0.05	41.45	2.92	0.05	62.43	62.9067	1	0	1	0
AG45075	3	0.03	0.05	23.77	4.77	0.05	0.46	45.6716	2	1	1	0
AG45076	3	0.03	0.05	23.44	0.33	0.05	0.46	85.7224	2	1	1	0
AG45077	3	0.03	0.05	17.22	2.84	0.05	0.46	74.8162	3	1	1	0
AG45078	3								2	1	1	0
AG45080	2	0.03	0.05	11.83	3.02	0.05	0.46	100.007	3	1	2	1
AG45081	3	0.03	132.76	37.3	8.47	0.05	29.6	71.4121	1	0	2	1
AG45084	2	0.03	0.05	26.66	7.05	0.05	0.46	84.2908	2	1	1	0
AG45085	2	0.03	10.78	21	15.03	38.78	0.46	44.8424	1	0	1	0
AG45087	3	2.82	1.17	7.91	4.8	0.05	0.46	60.0437	1	0	1	0
AG45088	3	0.03	0.05	24.76	0.02	36.75	0.46	73.1063	2	1	4	1
AG45089	3	0.03	93.72	42.51	32.41	0.05	0.46	60.9489	2	1	1	0
AG45090	2	0.03	0.05	22.07	0.02	0.05	92.97	127.91	3	1	1	0
AG45092	2	0.03	0.05	22.76	2.77	0.05	0.46	88.2607	1	0	1	0
AG45094	3	0.03	0.05	30.21	0.7	0.05	22.33	127.463	1	0	1	0
AG45095	2	0.03	20.22	20.26	4.44	89.62	0.46	53.2627	2	1	1	0
AG45096	3	0.03	0.05	14.94	1.56	0.05	0.46	68.24	2	1	1	0
AG45097	1	0.03	169.12	18.34	6.81	206.11	0.46	60.5618	3	1	1	0
AG45100	2	0.03	0.05	0.35	2.77	0.05	0.46	67.4119	2	1	1	0
AG45104	2	44.95	81.28	52.87	60.5	0.05	0.46	101.036	1	0	1	0
AG45105	3	0.03	0.05	30.77	0.02	0.05	0.46	97.111	1	0	1	0
AG45106	3	0.03	0.05	0.35	19.91	0.05	0.46	21.2981	1	0	1	0
AG45107	3	0.03	21.26	15.88	0.02	55.74	25.88	152.442	3	1	1	0
AG45109	3	0.03	29	27.57	6.1	110.22	0.46	70.3085	1	0	1	0
AG45111	1								1	0	1	0
AG45114	3	0.03	0.05	31.32	0.02	0.05	0.46	109.092	1	0	3	1
AG45115	3	0.03	0.05	20.63	0.02	32.21	0.46	32.9532	1	0	1	0
AG45119	3	0.03	0.05	19.12	11.05	0.05	0.46	86.7265			1	0
AG45123	3	0.03	0.05	45.75	0.02	0.05	0.46	45.999	1	0	3	1
AG45124	2	0.03	94.72	6.98	1.8	149.85	0.46	30.4392	1	0	1	0
AG45128	2	0.03	98.67	30.2	1.31	99.99	0.46	111.018	3	1	1	0
AG45129	3	0.03	0.05	25.81	0.02	0.05	0.46	90.683	2	1	1	0
AG45130	2	0.03	0.05	26.66	0.02	0.05	0.46	59.0117	3	1	1	0
AG45133	2	0.03	118.15	27.87	23.39	0.05	0.46	90.0041	1	0	1	0
AG45137	3	0.03	0.05	29.92	0.02	0.05	51.89	119.382	1	0	1	0
AG45138	3	9.62	0.05	23.1	1.8	0.05	25.46	48.1547	2	1	4	1
AG45140	3	0.03	0.05	26.35	11.29	0.05	121.21	138.883	1	0	2	1
AG45141	3								3	1	1	0
AG45142	1	0.03	0.05	19.12	0.02	0.05	0.46	95.5418	1	0	2	1
AG45143	3	0.03	0.05	26.66	2.77	67.96	0.46	85.168	2	1	1	0
AG45144	2								1	0	2	1
AG45146	3	0.03	0.05	18.34	3.72	0.05	0.46	33.4003
AG45148	3	40.4	87.31	67.84	66.48	154.8	286.01	30.0063	3	1	1	0
AG45152	3	12.32	90.98	35.04	52.3	206.56	62.01	105.754	3	1	1	0
AG45156	1
AG45158	3	0.03	13.26	6.6	14.41	19.76	0.46	42.7425	2	1	1	0
AG45160	3	0.03	57.8	31.9	0.02	127.63	5.54	81.6263
AG45161	3	0.03	0.05	38.52	5.63	32.21	62.01	103.883	1	0	2	1
AG45163	1	0.03	0.05	17.53	28.93	0.05	0.46	80.058	2	1	1	0
AG45164	3								1	0	1	0
AG45167	3								1	0	1	0
AG45168	3	0.03	0.05	29.63	0.02	0.05	0.46	96.095	1	0	1	0
AG45170	1	0.03	0.05	21.71	0.02	0.05	5.75	59.4136	1	0	3	1
AG45174	3								1	0	1	0
AG45175	3	0.03	0.05	25.41	1.8	163.89	0.46	114.123	1	0	1	0
AG45176	3	6.34	42.05	19.51	0.82	45.92	0.46	86.7021
AG45177	3	0.03	0.05	12.14	0.02	0.05	0.46	28.1519
AG45180	3	0.09	45.38	26.37	18.39	17.71	43.7	81.2513	1	0	3	1
AG45184	3	0.03	61.74	29.05	9.88	0.05	55.32	77.9388
AG45186	3								1	0	1	0
AG45187	3	0.03	0.05	6.38	2.27	0.05	0.46	21.077	2	1	1	0
AG45193	3	0.03	46.06	38.52	48.65	214.63	0.46	74.2004
AG45194	3	0.03	0.05	12.42	5.2	0.05	0.46	62.8773
AG45196	3	0.03	105.46	21.36	0.02	196.44	0.46	50.2111
AG45197	1	10.3	41.09	15.31	5.2	90.77	0.46	93.1054	3	1	1	0
AG45199	3
AG45200	3	0.03	86.27	11.45	1.8	158.06	0.46	51.1615	1	0	1	0
AG45201	3	0.03	0.05	6.98	0.02	0.05	0.46	107.071	1	0	1	0
AG45202	3								2	1	1	0
AG45203	3	1.74	26.69	23.8	54.7	1.54	0.46	41.714	1	0	5	1
AG45204	1	0.03	0.05	26.66	0.02	0.05	0.46	71.5023	1	0	1	0
AG45205	3	0.03	0.05	11.43	20.59	0.05	0.46	110.533			1	0
AG45206	3
AG45208	3	0.63	59.63	12.03	161.23	72.25	0.46	69.4272	2	1	2	1
AG45210	3	0.99	0.05	13.73	8.28	8.09	0.46	77.7606	2	1	3	1
AG45211	3	0.38	0.05	11.83	5.55	0.05	0.46	95.6013
AG45216	3								2	1	5	1
AG45218	1
AG45219	3								1	0	1	0
AG45222	3								1	0	1	0
AG45228	1	0.03	12.1	7.26	0.02	45.63	0.46	81.065			1	0
AG45231	3	0.03	0.05	6.16	0.02	0.05	0.46	54.1288	1	0	2	1
AG45232	3	10.61	0.49	14.93	9.99	25.89	19.07	77.606	3	1	1	0
AG45233	1	0.03	0.05	17.73	20.9	5.52	0.46	126.59	1	0	1	0
AG45234	3	1.31	17.48	8.13	4.48	31.78	47.35	121.767	1	0	2	1
AG45236	3								1	0	3	1
AG45238	2	1.31	15.65	16.81	42.55	17.71	0.46	72.616	1	0	1	0
AG45239	1	1.31	7.41	6.83	5.2	0.05	0.46	100.493	1	0	2	1
AG45240	2	0.03	0.05	4.05	15.85	0.7	0.46	88.6152	3	1	1	0
AG45242	3	0.03	0.05	14.93	130.53	0.05	0.46	87.0014	1	0	1	0
AG45243	3	0.03	0.05	10.83	2.27	10.15	0.46	52.2888
AG45244	1
AG45246	2	0.03	0.05	17.55	20.9	0.05	0.46	81.6331
AG45248	3								1	0	1	0
AG45249	3	0.63	0.05	8.97	9.99	0.05	0.46	86.4297	3	1	1	0
AG45250	3	0.03	0.05	1.09	0.02	3.75	0.46	74.2958	3	1	1	0
AG45252	3	0.03	5.79	7.48	9.32	10.15	0.46	105.699	2	1	1	0
AG45257	3	0.03	0.05	7.91	0.02	0.05	0.46	118.692	2	1	3	1
AG45260	3	0.03	24.02	12.22	0.67	28.1	0.46	78.0119	1	0	5	1
AG45262	3	0.09	26.43	18.28	92.98	8.62	0.46	104.343	3	1	1	0
AG45263	2	0.03	17.78	5.01	9.99	43.81	0.46	125.19	2	1	1	0
AG45267	2	10.61	63.67	23.97	16.17	144.44	81.93	117.943	2	1	1	0
AG45268	3	0.03	0.05	11.23	5.02	0.05	0.46	46.7498	1	0	1	0
AG45269	1	0.03	19.83	6.83	21.21	52.14	0.46	108.528	1	0	1	0
AG45272	3	0.03	72.49	23.62	137.19	17.71	0.46	100.28	1	0	1	0
AG45273	3	2.73	23.75	35.94	19.65	28.47	17.66	84.7746	1	0	1	0
AG45274	1	0.03	0.05	11.43	0.02	0.05	0.46	102.989	1	0	2	1
AG45280	2	0.03	0.05	4.29	0.02	0.05	0.46	94.3755	4	1	1	0
AG45283	1	0.03	0.05	9.81	20.9	0.05	0.46	58.3867	2	1	1	0
AG45284	3	0.03	10.73	15.31	0.67	17.71	0.46	114.505	2	1	2	1
AG45288	3	0.38	0.05	6.38	7.63	0.05	0.46	108.124	1	0	2	1
AG45291	3	0.03	0.05	8.13	25.23	0.05	11.83	116.765
AG45293	3	3.3	0.05	1.09	5.72	0.05	0.46	124.274	2	1	1	0
AG45294	3	0.38	1.9	47.02	89.97	0.05	0.46	50	2	1	2	1
AG45296	2	0.03	0.05	16.99	0.02	0.05	0.46	62.2027	2	1	1	0
AG45298	2	0.03	0.05	7.26	5.9	0.05	0.46	97.4984	1	0	1	0
AG45299	3
AG45300	3	0.03	0.05	16.62	1.29	0.05	0.46	121.332	1	0	2	1
AG45302	3	0.03	2.19	0.35	14.41	0.05	0.46	33.4131	3	1	1	0
AG45303	1	0.03	0.05	16.25	0.02	0.05	0.46	125.204	1	0	1	0
AG45304	3	3.67	0.05	1.09	28.12	0.05	0.46	83.23	3	1	1	0
AG45305	2	0.03	2.47	12.22	7.63	0.7	0.46	54.989			1	0
AG45307	3
AG45310	3	2.54	122.26	24.83	264.29	0.49	0.46	31.817	2	1	1	0
AG45311	3	0.03	0.05	21.87	0.02	2.95	0.46	44.2942	1	0	1	0
AG45313	3	0.03	0.05	1.09	8.48	0.05	0.46	34.1156	1	0	2	1
AG45314	2	0.56	82.01	19.48	64.92	10.48	0.46	94.6472	1	0	1	0
AG45321	2	0.03	74.88	26.2	93.4	140.75	0.46	38.7118	1	0	1	0
AG45323	3	35.74	57.89	135.38	223.14	163.57	176.01	80.4633	1	0	2	1
AG45324	3	0.09	0.05	10.42	0.02	0.49	0.46	64.5309	1	0	2	1
AG45325	3	0.03	6.41	0.35	84.6	0.05	0.46	123.475	1	0	2	1
AG45326	3	0.03	0.05	4.77	28.12	0.05	0.46	89.7293	1	0	2	1
AG45327	3	0.03	50.52	20.81	35.92	27.55	42.47	83.182	1	0	1	0
AG45331	2	0.03	36.3	16.81	106.74	0.05	0.46	66.9563	3	1	1	0
AG45334	3	0.03	0.05	5.24	19.49	0.05	63.86	29.663	2	1	1	0
AG45336	3	0.03	0.05	10.42	58.56	0.05	0.46	79.7907	2	1	1	0
AG45338	3	2.54	30.42	23.8	12.46	31.59	97.22	68.4221	2	1	1	0
AG45339	3								1	0	1	0
AG45343	3	0.03	2.19	17.36	23.84	0.05	0.46	138.532	1	0	3	1
AG45347	3	0.03	30.42	11.23	15.69	0.05	0.46	24.9632	2	1	1	0
AG45349	1	0.03	6.82	16.99	1.29	17.9	68.45	53.7913	2	1	1	0
AG45350	3	2.14	9.85	11.83	2.84	23.48	0.46	115.37	2	1	1	0
AG45352	3								1	0	2	1
AG45353	1	0.03	0.05	7.48	1.29	0.05	0.46	82.1193	1	0	2	1
AG45355	3	0.03	0.05	10.42	8.48	0.05	42.47	46.9992	1	0	1	0
AG45357	3
AG45359	3	0.03	0.05	6.6	11.15	31.59	0.46	74.6751	1	0	1	0
AG45365	1
AG45366	3	0.38	32.17	8.34	20.74	0.05	58.05	13.0689	2	1	1	0
AG45368	1	1.42	0.05	3.72	10.18	0.05	0.46	67.8874
AG45369	2	0.03	117.01	26.88	224.68	42.54	0.46	72.3912	1	0	1	0
AG45372	3	29.93	10.2	6.6	0.02	0.05	0.46	52.0787
AG45373	3	0.03	63.37	27.56	61.96	18.27	0.46	104.653	1	0	1	0
AG45375	3	4.56	0.05	8.34	15.05	5.33	0.46	35.7774	1	0	1	0
AG45383	2	0.03	148.19	11.03	73.77	0.05	0.46	112.106	4	1	2	1
AG45384	2	0.87	0.05	7.48	12.46	7.66	0.46	73.4471	2	1	1	0
AG45385	3								1	0	3	1
AG45392	3	0.03	3.62	10.52	0.99	7.69	0.46	106.902
AG45393	3	0.03	2.17	7.13	1.95	40.17	0.46	33.7492	2	1	2	1
AG45394	1
AG45395	3	0.03	6.43	3.99	135.14	7.29	0.46	92.986	2	1	1	0
AG45401	3	0.03	0.65	8.96	26.27	0.05	0.46	38.3668	2	1	1	0
AG45404	3	0.03	0.05	8.5	7.65	0.05	0.46	96.1261	1	0	1	0
AG45405	3	0.83	14.06	6.99	8.28	36.8	0.46	92.5925	2	1	1	0
AG45406	3	0.03	1.93	9.61	15.23	1.43	0.46	107.134
AG45407	3
AG45408	3	0.03	0.05	6.6	0.02	0.5	0.46	84.5053	2	1	1	0
AG45409	3	0.03	0.05	4.6	3.54	9.68	0.46	90.1075	1	0	2	1
AG45415	3								1	0	4	1
AG45417	3	1.28	14.94	11.03	7.65	40.92	22.78	76.0559	1	0	4	1
AG45418	3	0.99	18.43	12.7	4.49	64.89	0.46	80.4249	2	1	1	0
AG45421	3	0.03	0.05	6.27	0.03	0.05	0.46	74.3239	1	0	1	0
AG45422	3	0.12	3.38	7.32	1.95	0.05	0.46	112.731	1	0	1	0
AG45423	1	4	17.41	18.79	104.64	52.09	7.48	84.881	4	1	1	0
AG45424	3	0.03	0.05	3.78	0.02	6.07	0.46	83.0383			1	0
AG45426	1	0.12	0.05	7.39	8.92	0.05	50.1	79.351	1	0	1	0
AG45427	2								1	0	3	1
AG45431	3	0.03	1	18.66	2.58	0.05	0.46	371.49	2	1	1	0
AG45433	3	0.03	32.31	13.6	12.71	92.63	0.46	97.022	1	0	1	0
AG45435	1	1.56	0.05	12.38	4.17	12.25	0.46	60.1386	2	1	2	1
AG45436	3	0.12	0.05	13.98	1.95	0.05	27.71	149.409
AG45442	3	0.03	0.05	28.17	0.02	0.05	0.46	114.059	1	0	4	1
AG45450	1	0.03	189.17	59.04	45.68	129.94	0.46	61.027	1	0	1	0
AG45451	3	0.03	55.13	19.12	1.8	88.78	0.46	44.2613	1	0	2	1
AG45453	3	0.03	0.05	12.22	2.27	1.54	0.46	84.5786	1	0	2	1
AG45454	2	0.03	0.05	20.52	0.36	74.47	0.46	66.1399	1	0	1	0
AG45455	3	0.03	0.05	36.88	0.36	0.05	9.65	112.215	2	1	1	0
AG45456	3	0.03	0.05	64.43	0.02	0.05	256.02	100.824	1	0	2	1
AG45457	2	29.1	227.05	86.96	143.65	100.49	20.27	120.51	2	1	1	0
AG45462	3	0.03	164.27	50.18	46.95	154.81	0.46	98.1253	1	0	3	1
AG45463	1	21.08	63.65	68.72	10.88	0.05	9.65	83.4008
AG45467	2	3.1	11.4	14.79	19.73	0.05	0.46	76.7757	1	0	1	0
AG45469	3	0.03	0.05	27.23	5.17	0.05	98.12	83.1946	1	0	2	1
AG45471	3	0.03	0.05	20.52	0.02	0.05	0.46	42.7071	1	0	1	0
AG45473	2	0.78	14.65	16.84	8.13	48.19	0.46	195.622	1	0	2	1
AG45474	3	0.12	0.05	4.53	1.31	0.05	0.46	82.4664	1	0	3	1
AG45475	2	0.03	119.7	34.49	37.16	0.05	0.46	88.3452
AG45478	2	0.03	0.05	23.84	0.36	0.05	0.46	70.9347	1	0	1	0
AG45479	2	0.03	0.05	12.34	0.02	0.05	0.46	37.5097	1	0	2	1
AG45481	2								2	1	1	0
AG45484	3	0.03	0.05	17.77	0.02	0.05	0.46	58.6595
AG45485	1	0.03	168.39	30.01	9.27	176.07	0.46	49.1707
AG45486	3	0.03	0.1	5.93	0.99	18.64	0.46	92.9768	1	0	3	1
AG45489	3	0.03	0.05	0.35	0.02	0.05	0.46	83.4087	1	0	3	1
AG45490	3	0.03	0.05	16.52	0.03	2.09	0.46	105.828
AG45494	3	0.03	0.05	17.77	12.49	0.05	0.46	80.6291	2	1	1	0
AG45496	3	4.25	322.67	23.84	318.99	142.63	9.65	82.4684	2	1	2	1
AG45497	3	0.03	0.05	7.26	0.02	0.05	0.46	50.2803	3	1	1	0
AG45498	3								1	0	1	0
AG45499	1	64.38	273.39	132.42	467.54	251.36	56.93	59.6003	1	0	5	1
AG45501	1	0.03	0.05	8.07	7.64	35.33	23.36	82.9508	1	0	1	0
AG45503	3	0.03	0.05	6.2	0.02	0.05	0.46	63.459
AG45505	2	0.03	1.51	6.53	2.11	8.29	0.46	78.8917	3	1	1	0
AG45507	3	14.58	89.99	48.27	33.79	135.55	81.1	94.1905	1	0	1	0
AG45511	3	0.03	1.76	6.6	30.37	15.17	0.46	65.3654
AG45515	3	1.42	5.66	19.29	5.44	24.18	14.09	154.398	2	1	1	0
AG45520	3	0.27	0.05	14.81	2.27	0.05	0.46	415.61	2	1	1	0
AG45523	2	0.03	0.05	0.35	0.02	0.05	0.46	132.751	1	0	2	1
AG45526	2	0.27	25.42	9.61	14.6	31.55	0.46	148.448	3	1	1	0
AG45527	3	0.03	0.05	11.93	3.06	0.05	0.46	133.081	2	1	1	0
AG45529	3	0.03	45.28	11.42	83.73	1.43	0.46	94.8916	1	0	2	1
AG45530	3	0.27	0.05	14.11	7.65	0.5	0.46	61.0795	3	1	1	0
AG45533	3	0.56	0.05	2.4	1.95	0.05	200.89	105.666	1	0	4	1
AG45535	3	0.03	0.05	11.03	5.12	0.05	3.51	109.342	1	0	1	0
AG45538	3	0.03	0.05	2.41	0.68	0.05	0.46	82.8153	2	1	2	1
AG45539	3	0.99	0.05	6.2	1.63	3.59	0.46	107.266	1	0	2	1
AG45543	3	0.03	12.74	7.35	0.02	14.27	0.46	121.213	1	0	2	1
AG45549	3	1.51	0.05	2.99	10.9	2.06	0.46	36.5444	1	0	1	0
AG45550	1	0.03	0.05	14	29.41	0.05	51.97	82.6327
AG45551	3	17.02	17.75	23.86	26.66	51.06	41.74	51.1402	2	1	1	0
AG45554	3	0.03	0.05	14.08	27.87	0.05	0.46	195.45	1	0	1	0
AG45555	2								2	1	1	0
AG45556	3	0.03	36.37	19.61	10.54	3.78	71.33	78.4131	1	0	5	1
AG45557	3	0.17	1.36	5.97	95.51	0.05	0.46	78.7052	1	0	2	1
AG45559	2	0.03	0.05	6.23	0.5	0.05	0.46	168.112	2	1	1	0
AG45560	1	0.03	0.05	4.1	22.16	0.05	0.46	54.0648	1	0	4	1
AG45561	2	0.03	0.05	6.92	0.02	0.05	0.46	80.6308	1	0	1	0
AG45562	3	0.03	0.05	6.49	0.02	0.05	0.46	86.7514	1	0	2	1
AG45563	2	0.03	0.05	8.7	0.02	0.05	0.46	76.0793	1	0	1	0
AG45566	1	0.03	0.05	8.45	0.91	0.05	0.46	62.4513	2	1	1	0
AG45567	2	0.03	0.05	4.28	8.38	0.05	0.46	111.773	3	1	1	0
AG45569	2	0.03	0.05	0.35	11.79	5.87	0.46	101.319	1	0	2	1
AG45571	1	0.9	4.79	6.58	10.18	6.93	4.67	63.9434
AG45572	2	0.03	7.57	11.75	17.28	0.05	0.46	115.267	1	0	1	0
AG45574	3	0.03	0.05	6.32	0.02	0.05	0.46	53.5977	1	0	1	0
AG45578	2	0.03	0.05	14	5.46	8.17	0.46	52.6828	1	0	1	0
AG45579	3	0.03	1.77	18.92	2.84	7.1	0.46	66.8952	2	1	1	0
AG45580	2	0.03	0.05	5	0.08	0.05	0.46	97.3344	1	0	1	0
AG45581	3	0.03	2.16	11.26	0.08	4.99	0.46	38.9912	2	1	1	0
AG45582	3	3.35	3.26	5	8.38	0.05	0.46	43.0433
AG45583	2	0.03	6.52	5.53	38.97	0.05	0.46	42.2134	2	1	1	0
AG45584	2
AG45585	2	0.03	3.61	7.69	7.65	0.05	0.46	81.6949	1	0	1	0
AG45586	3	0.03	0.05	2.89	19.9	2.4	0.46	63.847
AG45588	3	1.79	26.2	9.12	24.24	17.72	26.65	57.4112	3	1	1	0
AG45590	3	0.03	0.05	7.69	13.04	0.05	78.32	50.8419	1	0	1	0
AG45592	3	0.03	0.05	5.27	7.11	0.05	0.46	123.85	1	0	3	1
AG45595	3	0.03	0.05	6.4	3.79	0.05	0.46	46.4207	2	1
AG45597	2	0.56	1.77	11.75	1.69	0.05	0.46	80.6758	1	0	2	1
AG45605	3	0.03	0.05	6.49	3.97	0.09	0.46	91.5658	1	0	1	0
AG45609	3	0.9	0.05	2.61	4.53	0.05	0.46	52.8897	1	0	1	0
AG45610	2	0.03	0.05	1.93	0.02	0.05	0.46	76.84			2	1
AG45613	1	0.03	6.52	6.75	3.6	0.05	0.46	73.8547	2	1	1	0
AG45614	2	0.03	0.05	3.36	0.91	0.05	0.46	70.5648	2	1	2	1
AG45617	3	0.03	2.35	6.66	0.5	0.05	0.46	73.4639	1	0	1	0
AG45623	2	0.03	4.95	8.11	22.86	0.05	0.46	67.842	3	1	2	1
AG45626	3	0.03	0.05	6.23	0.02	2.4	0.46	81.1422	1	0	1	0
AG45627	3	0.03	51.76	0.35	67.42	0.05	0.46	58.6741	1	0	1	0
AG45629	2	0.06	166.38	153.8	170.52	1.88	0.46	89.2484	1	0	2	1
AG45630	2	38.59	576.42	101.22	1529.7	64.62	25.21	47.2344	2	1	1	0
AG45633	3	0.03	8.82	0.35	0.92	13.37	0.46	72.2156	1	0	2	1
AG45636	2	0.03	52.8	26.72	28.21	90.45	0.46	110.581
AG45638	3	0.03	0.05	34.49	0.02	0.05	0.46	95.7169			3	1
AG45639	3	0.03	0.05	10.77	0.02	7.46	0.46	66.5657	1	0	2	1
AG45640	3	1.63	11.95	14.98	17.62	11.5	0.46	44.0823	2	1	1	0
AG45648	3	91.11	305.3	268.89	343.32	224.18	0.46	77.328	1	0	1	0
AG45649	1	0.03	24.49	57.77	2.93	41.52	67.84	69.5768	1	0	2	1
AG45653	3	0.03	70.81	29.36	0.02	33.35	68.83	38.4105	1	0	1	0
AG45654	1	0.03	23.33	21.21	0.02	81.87	0.46	113.358	1	0	2	1
AG45656	3	0.03	68.24	35.85	0.02	175.18	17.54	95.1132	2	1	1	0
AG45666	2	198.72	414.11	166.16	810.88	1125.33	31.47	144.326
AG45667	3	2.33	0.05	30	0.7	0.05	0.93	89.9693
AG45679	2	0.03	0.05	26.95	15.9	0.05	0.46	91.0123	3	1	1	0
AG45680	2	0.03	0.05	48.24	34.54	33.35	129.36	61.0296	1	0	1	0
AG45683	3								2	1	1	0
AG45689	1	0.03	13.29	28.93	0.7	61.49	0.46	87.6818	3	1	1	0
AG45692	1	3.54	0.05	29.79	7.3	0.05	26.96	67.3229	1	0	1	0
AG45693	3	0.03	35.3	8.32	0.02	111.43	170.29	80.465			2	1
AG45695	3	0.03	26.7	34.29	6	0.05	29.23	91.3174
AG45698	2	0.03	0.05	22.47	1.6	0.05	44.45	80.2248	1	0	3	1
AG45700	3	0.03	0.05	11.43	0.02	0.05	108.59	43.3459	1	0	1	0
AG45701	3	0.03	0.05	18.56	4.69	0.05	0.46	91.0293	1	0	1	0
AG45704	3	0.03	0.05	48.89	14.83	0.05	78.56	137.454
AG45709	3	0.03	0.05	35.47	0.02	0.05	0.46	69.187	1	0	1	0
AG45710	2	0.03	0.05	1.2	8.6	0.05	0.46	53.7509	1	0	1	0
AG45717	1	0.03	50.22	27.62	0.02	138.61	0.46	78.6428	1	0	2	1
AG45721	3	5.23	1.62	33.9	0.02	0.05	2.69	88.5421	2	1	1	0
AG45724	2	0.03	0.05	19.38	0.02	0.05	0.46	116.79	1	0	2	1
AG45726	3	0.03	0.05	25.81	3.81	0.05	0.46	62.052	3	1	1	0
AG45727	3	0.03	551.74	50.03	208.75	412.13	0.46	71.702	2	1	1	0
AG45728	3	0.03	29.78	16.57	0.25	56.56	0.46	63.8134	3	1	1	0
AG45733	3	0.03	36.99	19.38	18.46	0.05	0.46	63.73
AG45735	2	0.03	0.05	0.35	16.54	0.05	0.46	63.8258	1	0	2	1
AG45739	1	0.03	101.43	25.12	2.93	257.1	35.87	96.927	1	0	3	1
AG45741	3	0.03	220.15	63.44	294.61	4.31	0.46	123.244	1	0	1	0
AG45742	2	0.03	0.05	24.41	0.02	0.05	0.46	65.7836
AG45747	3	0.03	0.05	21.47	28.64	0.05	0.46	84.231	2	1	1	0
AG45749	3	7.89	0.05	25.89	7.54	58.5	18.67	97.7836
AG45750	3	0.03	0.05	28.72	0.02	0.05	0.46	90.4094	2	1	1	0
AG45757	1	0.03	0.05	27.61	3.38	0.05	7.65	58.9198	1	0	1	0
AG45759	3	0.03	0.05	28.17	24.45	0.05	0.46	77.0854
AG45760	3	8.67	0.05	20.84	2.46	0.05	20.35	69.4544	1	0	1	0
AG45761	3	0.03	0.05	21.52	7.54	0.05	0.46	65.8311	3	1	1	0
AG45768	3								1	0	2	1
AG45775	3								1	0	1	0
AG45777	3	0.03	0.05	31.9	1.06	0.05	0.46	71.2991	1	0	1	0
AG45780	3	0.03	0.05	29.81	14.64	0.05	0.46	66.9659	1	0	3	1
AG45781	3	0.03	0.05	22.82	0.02	0.05	0.46	67.2102
AG45786	3	19.58	0.05	42.51	5.69	101.29	124.63	71.3802	1	0	2	1
AG45792	2	0.03	0.05	45.4	2.92	0.05	20.35	94.6587	2	1	1	0
AG45812	3	0.03	27.68	31.13	46.47	0.05	0.46	68.5731	1	0	1	0
AG45813	3	0.03	83.06	37.69	15.56	409.34	0.46	64.1138
